# Supplementary material for: The digital biomarker discovery pipeline: An open-source software platform for the development of digital biomarkers using mHealth and wearables data
Source: PubMed Central journal article supplement (PMC8057397; doi:10.1017/cts.2020.511), 2020-07-14
Supplement: S2059866120005117sup001.pdf [file S2059866120005117sup001.pdf]

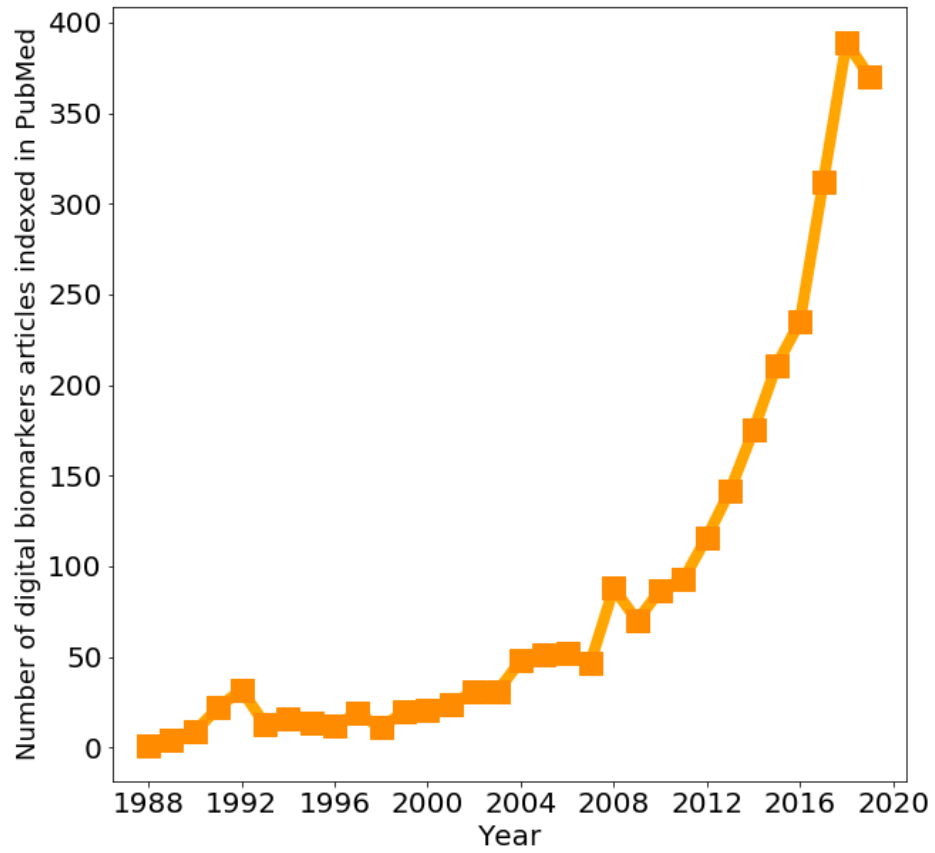

**Supplementary Figure 1.** Growth of digital biomarkers research studies indexed in PubMed.
